# Supplementary material for: Tannic acid-inspired, self-healing, and dual stimuli responsive dynamic hydrogel with potent antibacterial and anti-oxidative properties
Source: Royal Society of Chemistry journal article supplement (doi:10.1039/d1tb00156f), 2021-01-01
Supplement: d1tb00156f3.pdf [file d1tb00156f3.pdf]

# Tannic acid-inspired, self-healing, and dual stimuli responsive dynamic hydrogel with potent antibacterial and anti-oxidative properties

Wen Shi <sup>a, b, \*</sup>, Yunfan Kong <sup>a, b</sup>, Yajuan Su <sup>a, c</sup>, Mitchell A. Kuss <sup>a, b</sup>, Xiping Jiang <sup>a, d</sup>, Xiaowei Li <sup>a, e</sup>, Jingwei Xie <sup>a, c, f</sup>, and Bin Duan <sup>a, b, c, f, \*</sup>

<sup>a</sup>*Mary & Dick Holland Regenerative Medicine Program, University of Nebraska*

*Medical Center, Omaha, NE, USA*

<sup>b</sup>*Division of Cardiology, Department of Internal Medicine, University of Nebraska*

*Medical Center, Omaha, NE, USA*

<sup>c</sup>*Department of Surgery, University of Nebraska Medical Center, Omaha, NE, USA*

<sup>d</sup>*Molecular Genetics and Cell Biology Program, Department of Genetics, Cell Biology and Anatomy, University of Nebraska Medical Center, Omaha, NE, 68198, USA*

<sup>e</sup>*Department of Neurological Sciences, University of Nebraska Medical Center, Omaha, NE, USA*

<sup>f</sup>*Department of Mechanical and Materials Engineering, University of Nebraska-Lincoln, Lincoln, NE, USA*

\*Corresponding Author:

[w.shi@unmc.edu](mailto:w.shi@unmc.edu) ; Tel: +1 402 559 5717

[bin.duan@unmc.edu](mailto:bin.duan@unmc.edu) ; Tel: +1 402 559 9637

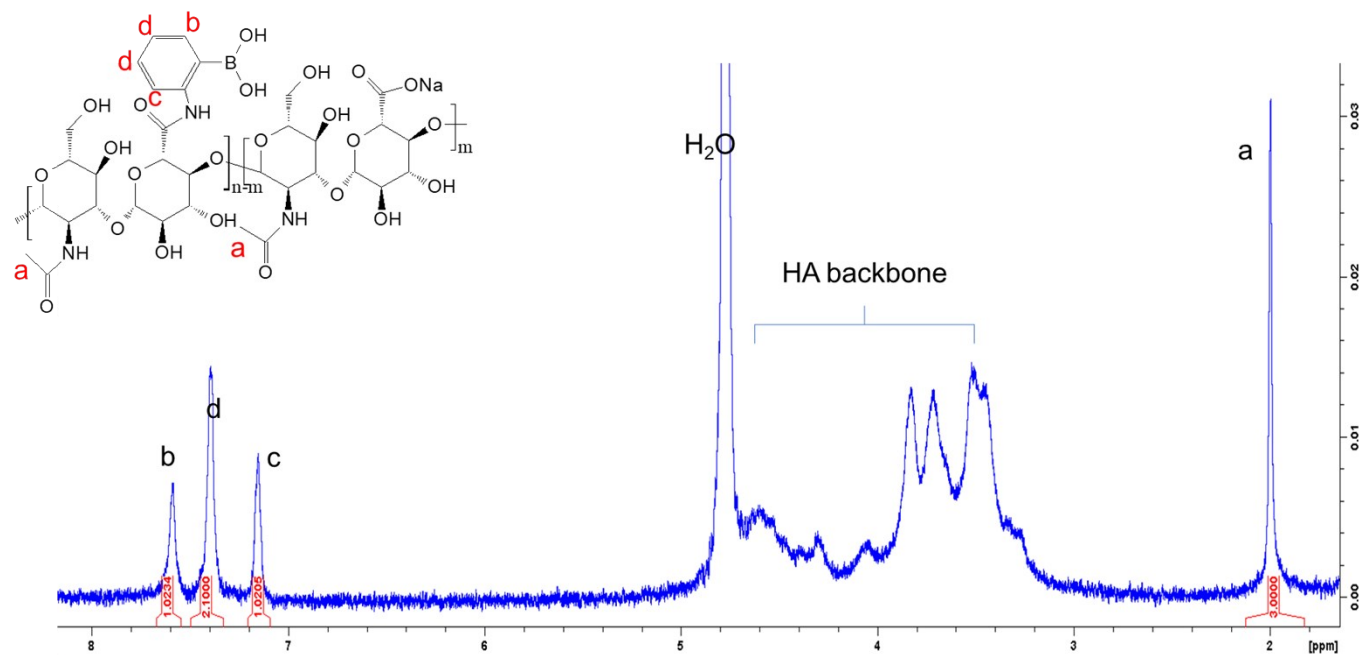

Figure S1. NMR spectra of HA-PBA.

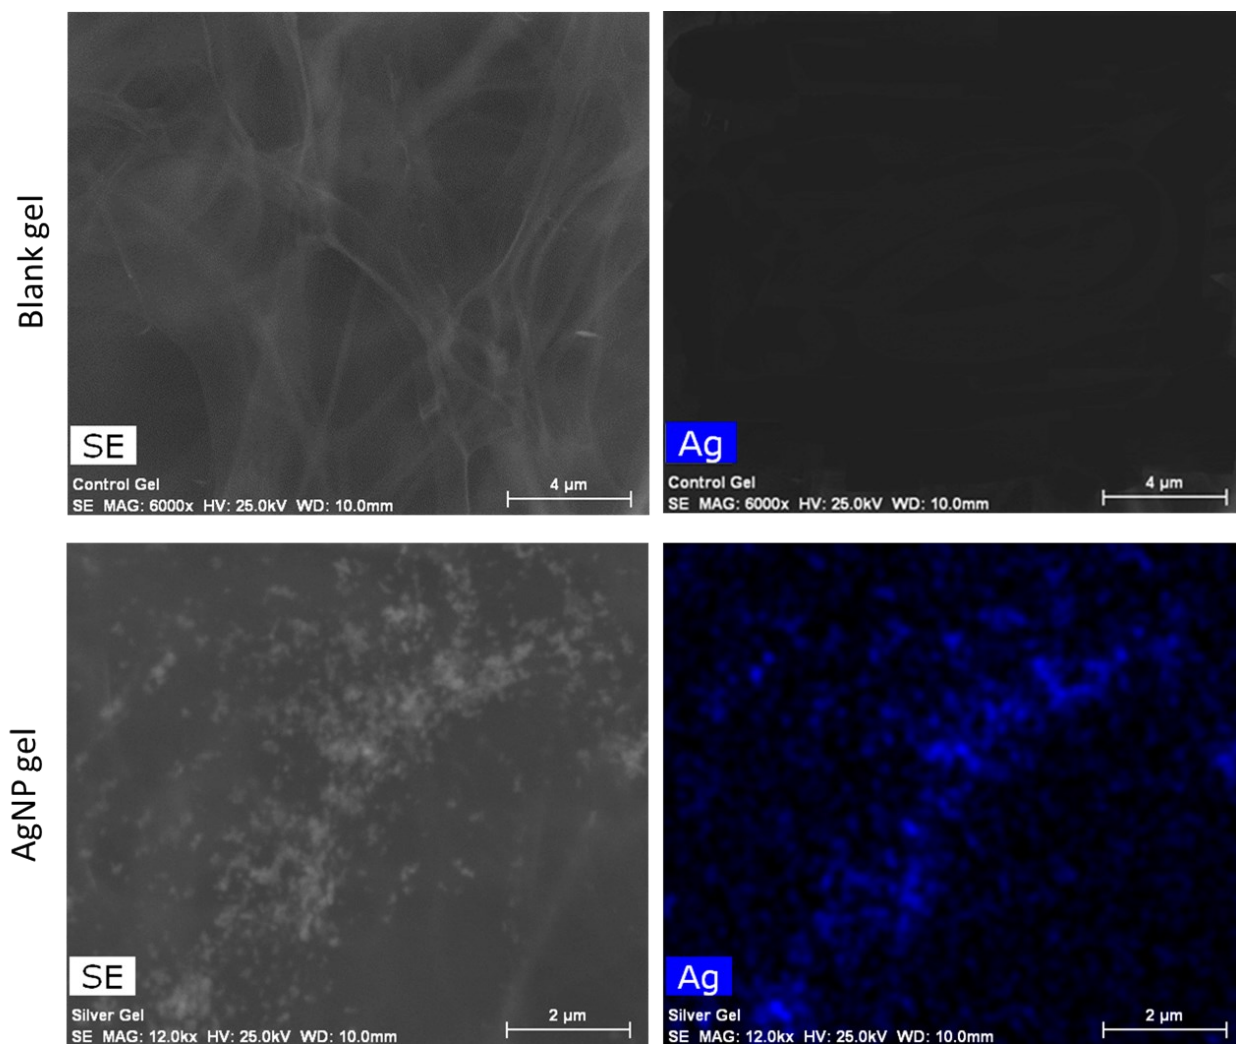

Figure S2. SEM-EDX images for the blank gel and AgNP gel. EDX mapping confirmed the nanoparticles found in AgNP gel were silver nanoparticles.

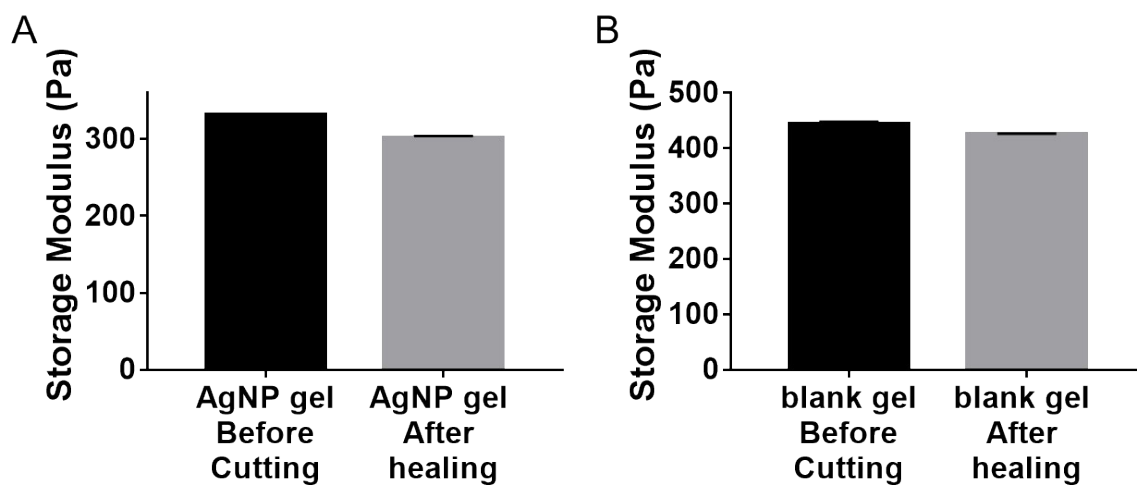

Figure S3. A&B) Storage modulus ( $G'$ ) of AgNP hydrogel and blank hydrogel before cutting and after healing.

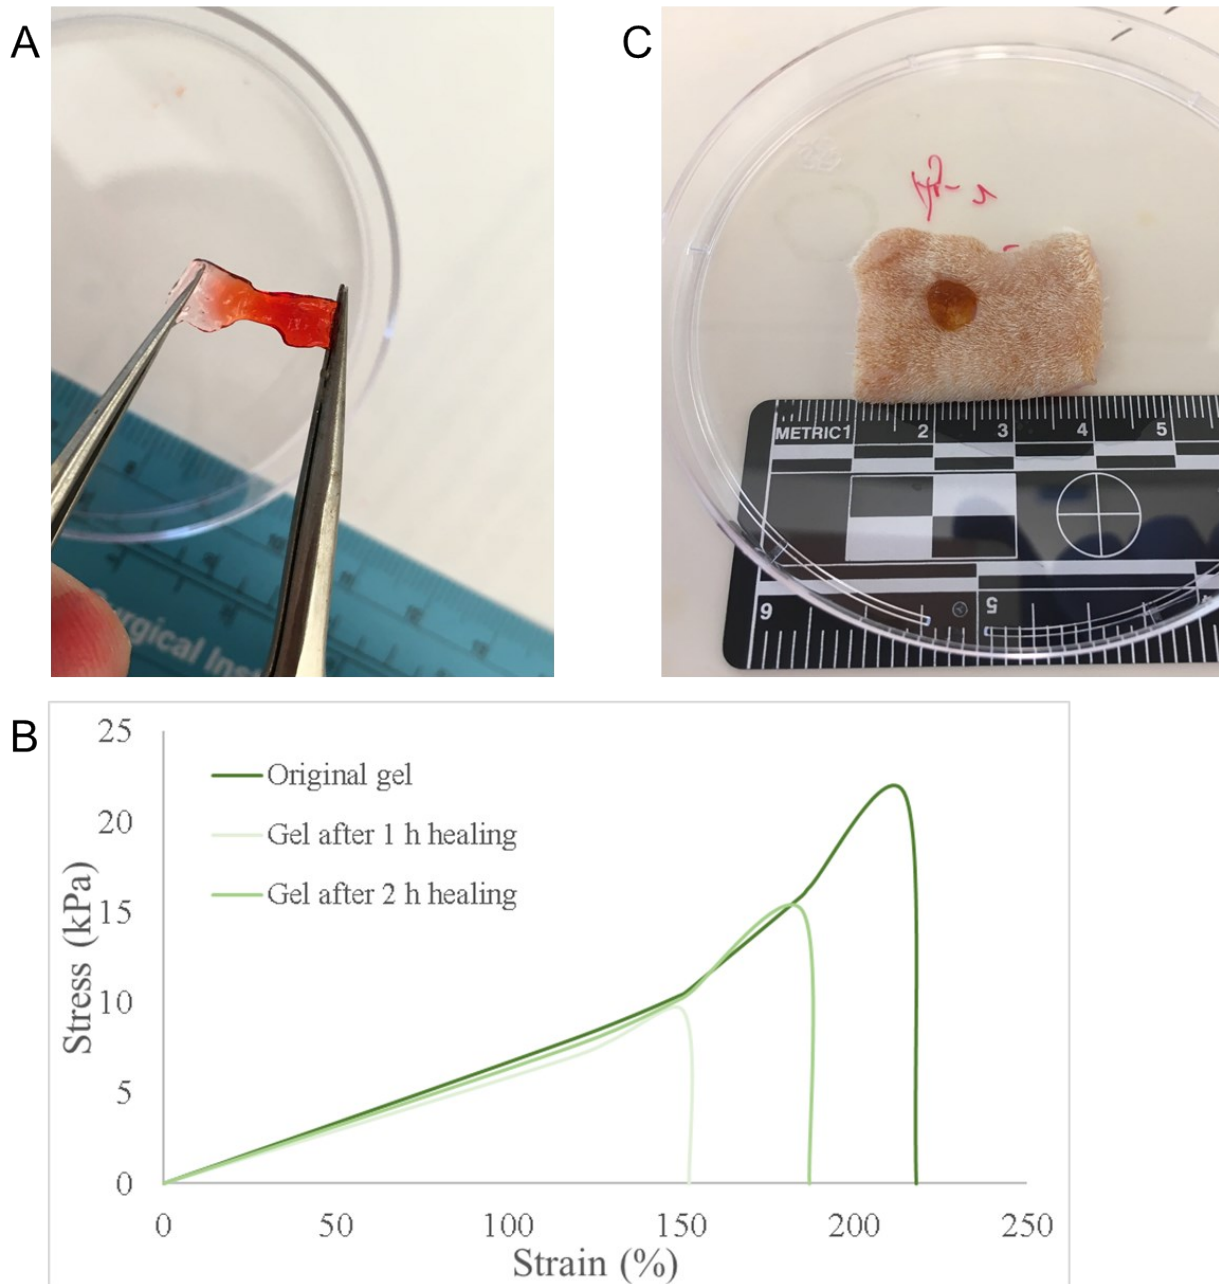

Figure S4. Self-healing and injectability of dynamic hydrogel. A) Two pieces of HA-PBA-TA hydrogel were healed together and could be pulled on the edges by the tweezers performing like a single piece of hydrogel; B) evaluation of tensile stress-strain curve for the dynamic hydrogel before cutting and after healing; C) illustration of AgNP loaded hydrogel easily injected through needles and filled into skin wound area as a dressing.

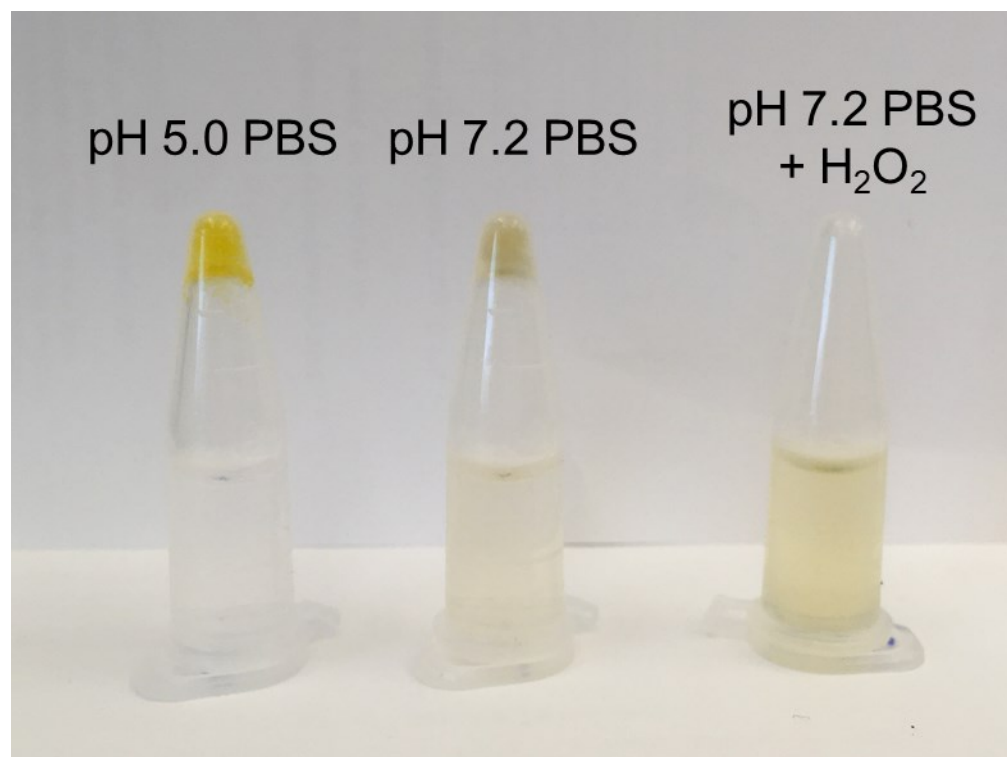

Figure S5. FITC-BSA loaded HA-PBA-TA hydrogel after 20 h incubation in different solution.

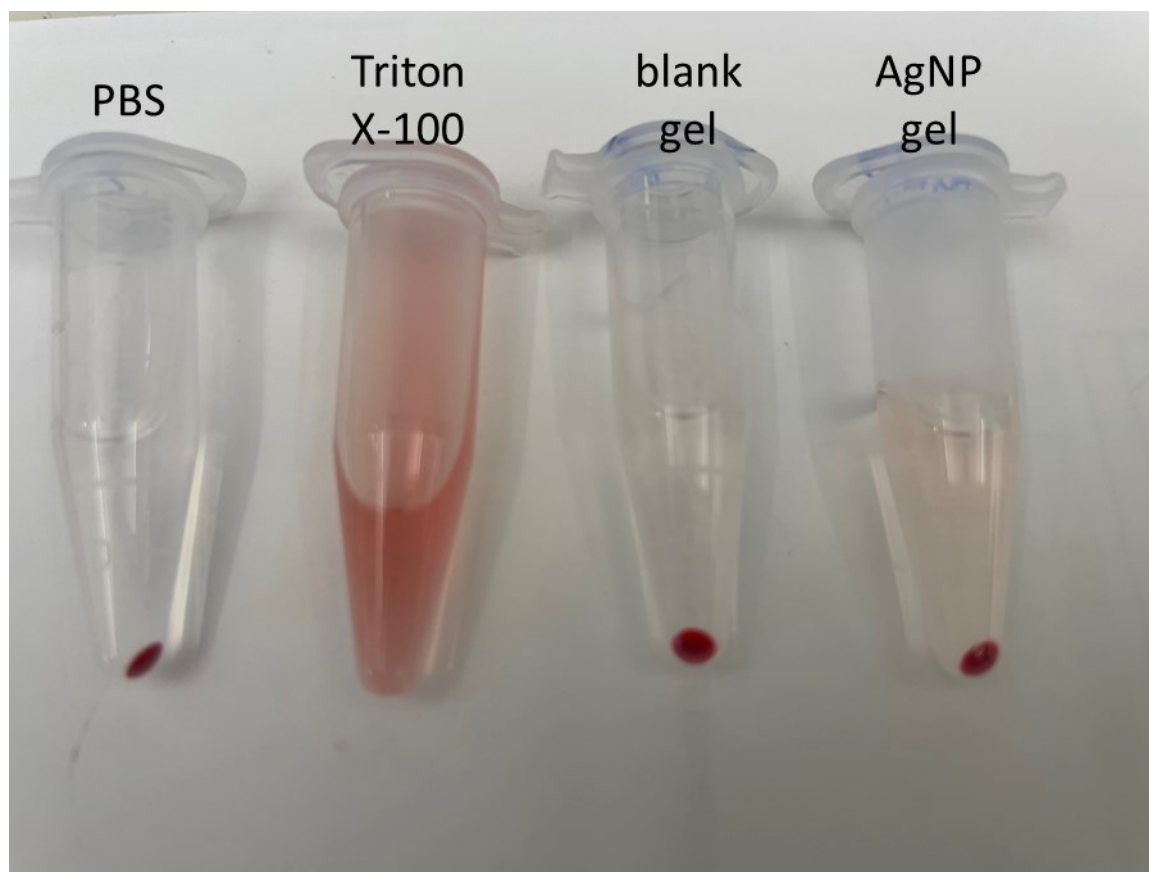

Figure S6. Representative images of samples after the in vitro hemolysis assay.

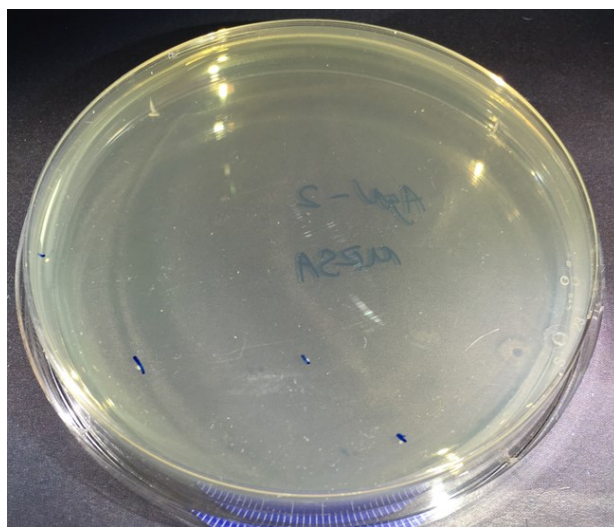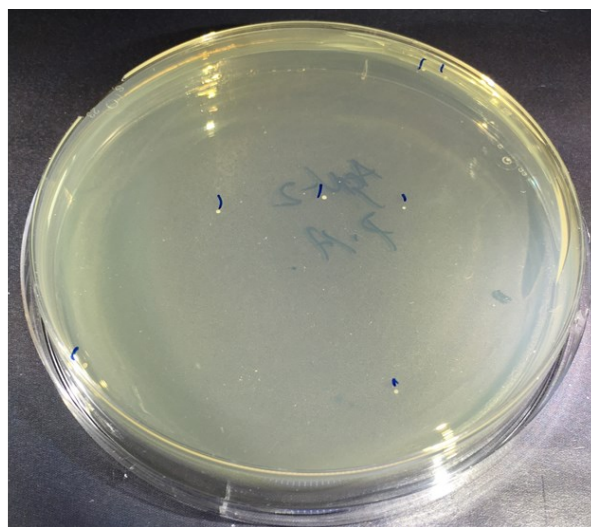

Figure S7. Only few MRSA (left) and PA (right) colonies were proliferated from the bacteria suspension collected after the AgNP gel incubation.
